# Supplementary material
Source: Springer Nature journal article supplement (https://www.springermedizin.de/resource/supplementary/12955_2013_1318_MOESM2_ESM.pdf/9559548)
Supplement: MOESM2 [file 9559548]

# Overall survival according to QoL availability

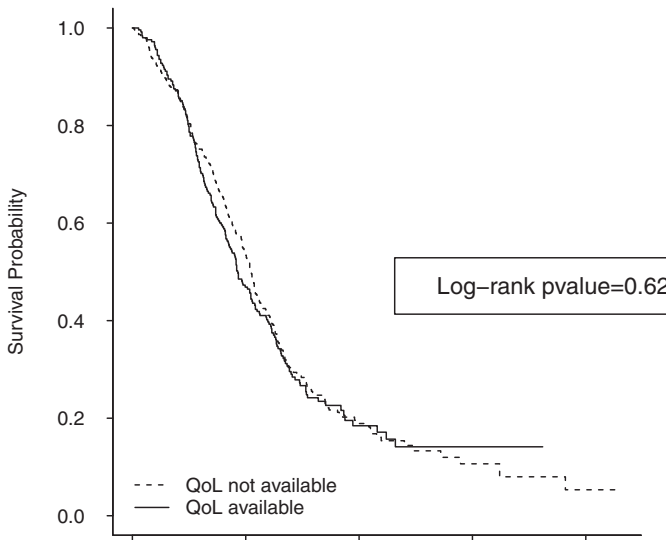

0 20 40 60 80  
Months

Number at risk

|                   |     |     |     |    |   |   |
|-------------------|-----|-----|-----|----|---|---|
| QoL not available | --- | 371 | 197 | 28 | 6 | 1 |
| QoL available     | —   | 249 | 114 | 16 | 2 |   |
